# Supplementary material for: Predicting spatial familiarity by exploiting head and eye movements during pedestrian navigation in the real world
Source: Springer Nature journal article supplement (doi:10.1038/s41598-025-92274-4), 2025-03-07
Supplement: MOESM1 [file 41598_2025_92274_MOESM1_ESM.pdf]

# Predicting spatial familiarity by exploiting head and eye movements during pedestrian navigation in the real world – Supplementary Information

Markus Kattenbeck<sup>1,\*</sup>, Ioannis Giannopoulos<sup>1</sup>, Negar Alinaghi<sup>1</sup>,  
Antonia Golab<sup>2</sup>, and Daniel R. Montello<sup>3</sup>

<sup>1</sup>TU Wien, Research Unit Geoinformation, Vienna, 1040, Austria

<sup>2</sup>TU Wien, Energy Economics Group, Vienna, 1040, Austria

<sup>3</sup>UC Santa Barbara, Geography, Santa Barbara, CA 93117, USA

\*markus.kattenbeck@tuwien.ac.at

February 22, 2025

Table 1: Overview of all 99 head-mounted IMU features.

| Category                                  | Features                    | Definition                                                                                                                                                                                                              | Count |
|-------------------------------------------|-----------------------------|-------------------------------------------------------------------------------------------------------------------------------------------------------------------------------------------------------------------------|-------|
| Statistical Measures (avg/ min/ max/ var) | Acc-X                       | Acceleration along the $X$ axis                                                                                                                                                                                         | 4     |
|                                           | Acc-Y                       | Acceleration along the $Y$ axis                                                                                                                                                                                         | 4     |
|                                           | Acc-Z                       | Acceleration along the $Z$ axis                                                                                                                                                                                         | 4     |
|                                           | Acc-all                     | Total acceleration, computed as the magnitude of the three acceleration signals                                                                                                                                         | 4     |
|                                           | Roll                        | The rotation around the longitudinal axis                                                                                                                                                                               | 4     |
|                                           | Pitch                       | The rotation around the lateral axis                                                                                                                                                                                    | 4     |
|                                           | Yaw                         | The rotation around the vertical axis                                                                                                                                                                                   | 4     |
| Animals Movement Patterns                 | movement-intensity          | The mean of the Euclidean norm (magnitude) of three-dimensional acceleration values                                                                                                                                     | 1     |
|                                           | signal-magnitude-area       | The mean of the sum of the absolute values of three-dimensional acceleration components                                                                                                                                 | 1     |
|                                           | energy-acc                  | The mean of the squared power of the sum of the squares of three-dimensional acceleration components                                                                                                                    | 1     |
|                                           | entropy-acc                 | The mean of the entropy-like measure based on the logarithm of the sum of the squares of the three-dimensional acceleration components                                                                                  | 1     |
|                                           | movement-variation          | The mean of the sum of the absolute differences between consecutive values of each of the three-dimensional acceleration components                                                                                     | 1     |
| Audio Signal Processing                   | acc-zero-crossing-count     | The number of zero-crossings in the acceleration signal                                                                                                                                                                 | 1     |
|                                           | acc-zero-crossing-rate      | The rate of zero-crossings in the acceleration signal                                                                                                                                                                   | 1     |
|                                           | acc-spectral-rolloff-mean   | The rolloff point indicates the point in the frequency spectrum where most of the energy of the signal is concentrated. The mean and variance can be used to analyze the distribution of spectral energy in the signal. | 1     |
|                                           | acc-spectral-rolloff-var    |                                                                                                                                                                                                                         | 1     |
|                                           | acc-spectral-centroid       | The spectral centroid is a measure that indicates where the center of mass of the spectrum is located.                                                                                                                  | 1     |
|                                           | acc-chroma-frequencies-mean | The mean of the chroma features which represent the twelve different pitch classes                                                                                                                                      | 1     |
| Human Movement Patterns                   | cepstral-coeff-Acc[0:50]    | The average of scaled Mel-frequency cepstral coefficients (MFCCs). MFCC captures the timbral texture of the signal by representing its short-term power spectrum on a Mel frequency scale.                              | 50    |
|                                           | p2p-Acc-X-amplitude         | Peak-to-peak amplitude of the acceleration signals                                                                                                                                                                      | 1     |
|                                           | p2p-Acc-Y-amplitude         |                                                                                                                                                                                                                         | 1     |
|                                           | p2p-Acc-Z-amplitude         |                                                                                                                                                                                                                         | 1     |
|                                           | p2p-FreeAcc-E-amplitude     |                                                                                                                                                                                                                         | 1     |
|                                           | p2p-FreeAcc-N-amplitude     |                                                                                                                                                                                                                         | 1     |
|                                           | p2p-FreeAcc-U-amplitude     |                                                                                                                                                                                                                         | 1     |
|                                           | acc-signal-frequency        | The dominant frequency of a signal according to its autocorrelation function and identifying the delay corresponding to the first significant peak.                                                                     | 1     |
|                                           | avg-std-Acc                 | Average of the standard deviation of the three-dimensional acceleration components                                                                                                                                      | 1     |
|                                           | acc-fundamental-period      | The mean period of zero-crossings in the acceleration signal, used to estimate the dominant frequency of the signal                                                                                                     | 1     |
| Custom                                    | freq-change-Yaw             | The number of times the sequence of values in Yaw changes direction                                                                                                                                                     | 1     |
